# Supplementary material for: Association between dietary calcium intake and BMD in children and adolescents
Source: PubMed Central journal article supplement — Endocr Connect. 2020 Jan 27;9(3):194–200. doi: 10.1530/EC-19-0534 (PMC7040863; doi:10.1530/ec-19-0534), 2020-01-27
Supplement: supplementary_table_1.pdf [file supplementary_table_1.pdf]

Supplementary Table 1. Description of dietary calcium intake and total bone mineral density stratified by age and sex.

| Stratified by age                               | 8-11y         | 12-15y        | 16-19y        | P value |
|-------------------------------------------------|---------------|---------------|---------------|---------|
| Dietary calcium intake (g/d)                    | 0.991 ± 0.496 | 1.013 ± 0.613 | 1.019 ± 0.694 | 0.1383  |
| Total bone mineral density (g/cm <sup>2</sup> ) | 0.84 ± 0.08   | 1.01 ± 0.10   | 1.14 ± 0.11   | <0.0001 |
| Stratified by sex                               | Male          | Female        |               |         |
| Dietary calcium intake (g/d)                    | 1.111 ± 0.663 | 0.871 ± 0.495 |               | <0.0001 |
| Total bone mineral density (g/cm <sup>2</sup> ) | 1.01 ± 0.17   | 0.99 ± 0.14   |               | <0.0001 |
